# Supplementary material for: Zinc isotopes from archaeological bones provide reliable trophic level information for marine mammals
Source: Commun Biol. 2021 Jun 3;4:683. doi: 10.1038/s42003-021-02212-z (PMC8175341; doi:10.1038/s42003-021-02212-z)
Supplement: Supplementary file 5 — Supplementary Data 2 [file 42003_2021_2212_MOESM5_ESM.xlsx]

## Sheet: Bone samples
Sample	Site	Species	Method 1	Method 2	Method 3	Δ66Zn			SD for different dissolution methods
			d66Zn (‰ JMC Lyon)	d66Zn (‰ JMC Lyon)	d66Zn (‰ JMC Lyon)	Δ66ZnMethod1-2	Δ66ZnMethod1-3	Δ66ZnMethod2-3	1SD
7789	KkJg-1	P. hispida	0.460204	0.434684		0.0255196			0.0180451
7785	KkJg-1	P. hispida	0.485346	0.439092	0.574817	0.0462533	-0.0894717	-0.135725	0.0689998
7765	KkJg-1	P. hispida	0.570814	0.513982		0.0568324			0.0401866
7731	KkJg-1	P. hispida	0.330414	0.37849	0.37458	-0.0480768	-0.0441666	0.00391017	0.0267
7709	KkJg-1	P. hispida	0.445099	0.288436		0.156663			0.110778
7702	KkJg-1	P. hispida	0.47619	0.455318		0.0208725			0.0147591
7763	KkJg-1	P. hispida	0.587349	0.452396		0.134954			0.0954265
7736	KkJg-1	P. hispida		0.305188	0.290789			0.0143993	0.0101819
7817	KkJg-1	P. hispida	0.572067	0.595845		-0.0237782			0.0168137
7820	KkJg-1	P. hispida	0.496378	0.51085		-0.0144722			0.0102334
7825	KkJg-1	P. hispida	0.519608	0.532231		-0.0126229			0.00892571
7524	SfFk-4	P. hispida	0.515372	0.470513		0.0448587			0.0317199
7505	SfFk-4	P. hispida	0.455635	0.492098	0.492205	-0.0364624	-0.0365698	-0.000107324	0.0210827
7506	SfFk-4	P. hispida	0.254313	0.203367	0.219769	0.0509461	0.034544	-0.0164021	0.0260058
7514	SfFk-4	P. hispida	0.479489	0.508543	0.475327	-0.0290537	0.0041621	0.0332158	0.0180957
7520	SfFk-4	P. hispida	0.303562	0.349656		-0.0460937			0.0325932
7531	SfFk-4	P. hispida	0.373537	0.250927		0.122611			0.0866989
7544	SfFk-4	P. hispida	0.293998	0.272861		0.0211374			0.0149464
7497	SfFk-4	P. hispida	0.323787	0.355037		-0.0312498			0.0220969
6261	RbJu-1	P. hispida	0.469637	0.485218		-0.015581			0.0110174
6253	RbJu-1	P. hispida	0.404606		0.503662		-0.0990558		0.070043
6245	RbJu-1	P. hispida	0.61669		0.66045		-0.0437599		0.0309429
6247	RbJu-1	P. hispida	0.664027		0.618564		0.045463		0.0321472
9531	OkRn-1	P. hispida	0.366672		0.433246		-0.0665734		0.0470745
9532	OkRn-1	P. hispida	0.423279		0.420221		0.0030579		0.00216226
9533	OkRn-1	P. hispida	0.40668		0.438876		-0.032196		0.022766
Mean		P. hispida	0.45179	0.414737	0.458542	0.0493704	0.0453655	0.0339242	0.0342478

## Sheet: Reference material
Reference material	Method 1	Method 2	Method 3
	d66Zn (‰ JMC Lyon)	d66Zn (‰ JMC Lyon)	d66Zn (‰ JMC Lyon)
SRM_1400	0.938381	0.923214	0.894788
SRM_1400	0.968032	0.949939	0.951415
SRM_1400	0.925125	0.97526	0.986799
SRM_1400	0.953119	0.993837	0.940544
SRM_1400	0.981309	0.978818	0.979561
SRM_1400	0.967241	0.925638	0.968437
SRM_1400	0.949765	0.968032	0.931589
SRM_1486	1.21926	1.23862	1.19149
SRM_1486	1.28391	1.261	1.26377
SRM_1486	1.22826	1.2284	1.23702
SRM_1486	1.23532	1.16153	1.19766
SRM_1486	1.2159	1.26042	1.19716
SRM_1400 mean	0.95471	0.959248	0.950448
SRM_1486 mean	1.23653	1.22999	1.21742
